# Supplementary material
Source: Springer Nature journal article supplement (https://www.springermedizin.de/resource/supplementary/12885_2013_4438_MOESM1_ESM.pdf/9466272)
Supplement: MOESM1 [file 9466272]

|                  | Grade I | Grade II | Grade III | Grade IV |
|------------------|---------|----------|-----------|----------|
| Anemia           | 27      | 14       | 1         |          |
| Transaminases    | 19      |          | 1         |          |
| Nausea, Vomiting | 16      | 4        |           |          |
| Neutropenia      | 9       | 10       | 10        | 2        |
| Creatinine       | 7       | 1        |           |          |
| Diarrhea         | 5       | 3        |           |          |
| Fever            | 2       | 3        |           |          |
| Thrombopenia     | 1       | 2        | 1         |          |
| Bilirubin        |         |          |           |          |
